# Supplementary material for: CdSe nanorod/TiO2 nanoparticle heterojunctions with enhanced solar- and visible-light photocatalytic activity
Source: publisher site journal article supplement (doi:10.3762/bjnano.8.273), 2017-12-19
Supplement: Additional file 1 [file 2190-4286-8-273-S1.pdf]

# **Supporting Information**

## **for**

### **CdSe nanorod/TiO<sub>2</sub> nanoparticle heterojunctions**

### **with enhanced solar- and visible-light photocatalytic**

### **activity**

Fakher Laatar<sup>1</sup>, Hatem Moussa<sup>2</sup>, Halima Alem<sup>3</sup>, Lavinia Balan<sup>4</sup>, Emilien Girot<sup>2</sup>,  
Ghouthi Medjahdi<sup>3</sup>, Hatem Ezzaouia<sup>1</sup> and Raphaël Schneider<sup>\*2</sup>

Address: <sup>1</sup>Laboratory of Semiconductors, Nanostructures and Advanced Technology (LSNTA), Center for Research and Technology Energy, Tourist Route Soliman, BP 95, 2050 Hammam-Lif, Tunisia, <sup>2</sup>Laboratoire Réactions et Génie des Procédés (LRGP), UMR 7274 CNRS Université de Lorraine, 1 rue Grandville 54001 Nancy, France, <sup>3</sup>Institut Jean Lamour (IJL), UMR 7198 CNRS Université de Lorraine, BP 70239, 54506 Vandoeuvre-lès-Nancy Cedex, France, and <sup>4</sup>Institut de Science des Matériaux de Mulhouse (IS2M), CNRS UMR 7361, 15 rue Jean Starcky, 68093 Mulhouse, France

Email: Raphaël Schneider - raphael.schneider@univ-lorraine.fr

\* Corresponding author

## **Additional figures**

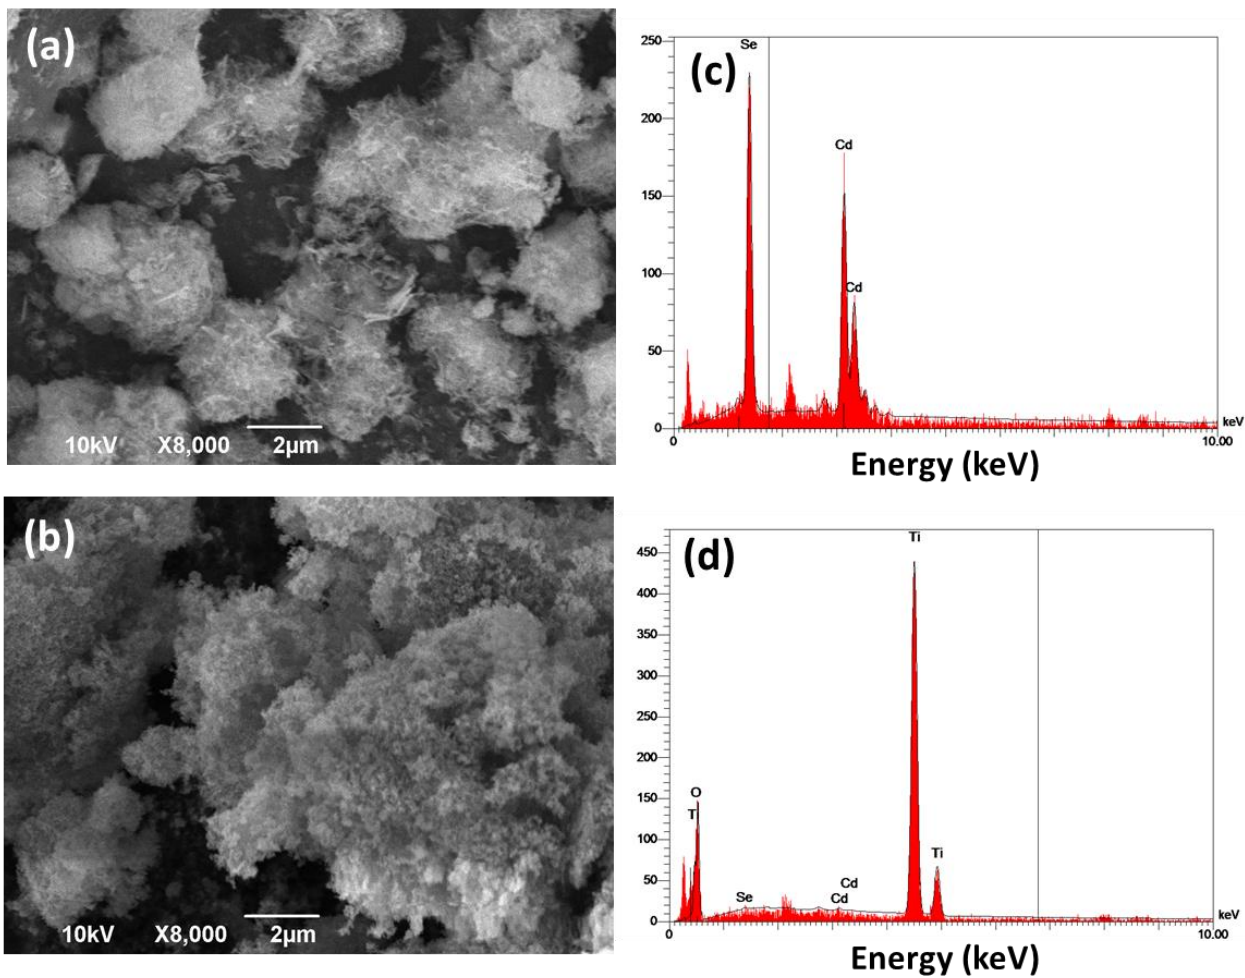

**Figure S1:** SEM images of (a) CdSe NRs and (b) CdSe (2%)/TiO<sub>2</sub> particles. (c) and (d) are the associated EDX analyses.

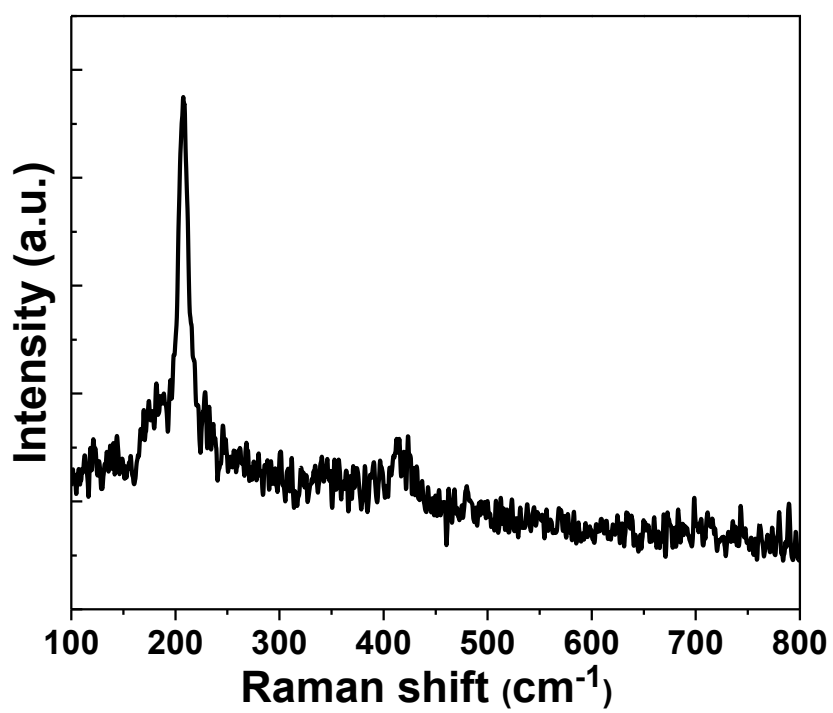

**Figure S2:** Raman spectrum of CdSe NRs.

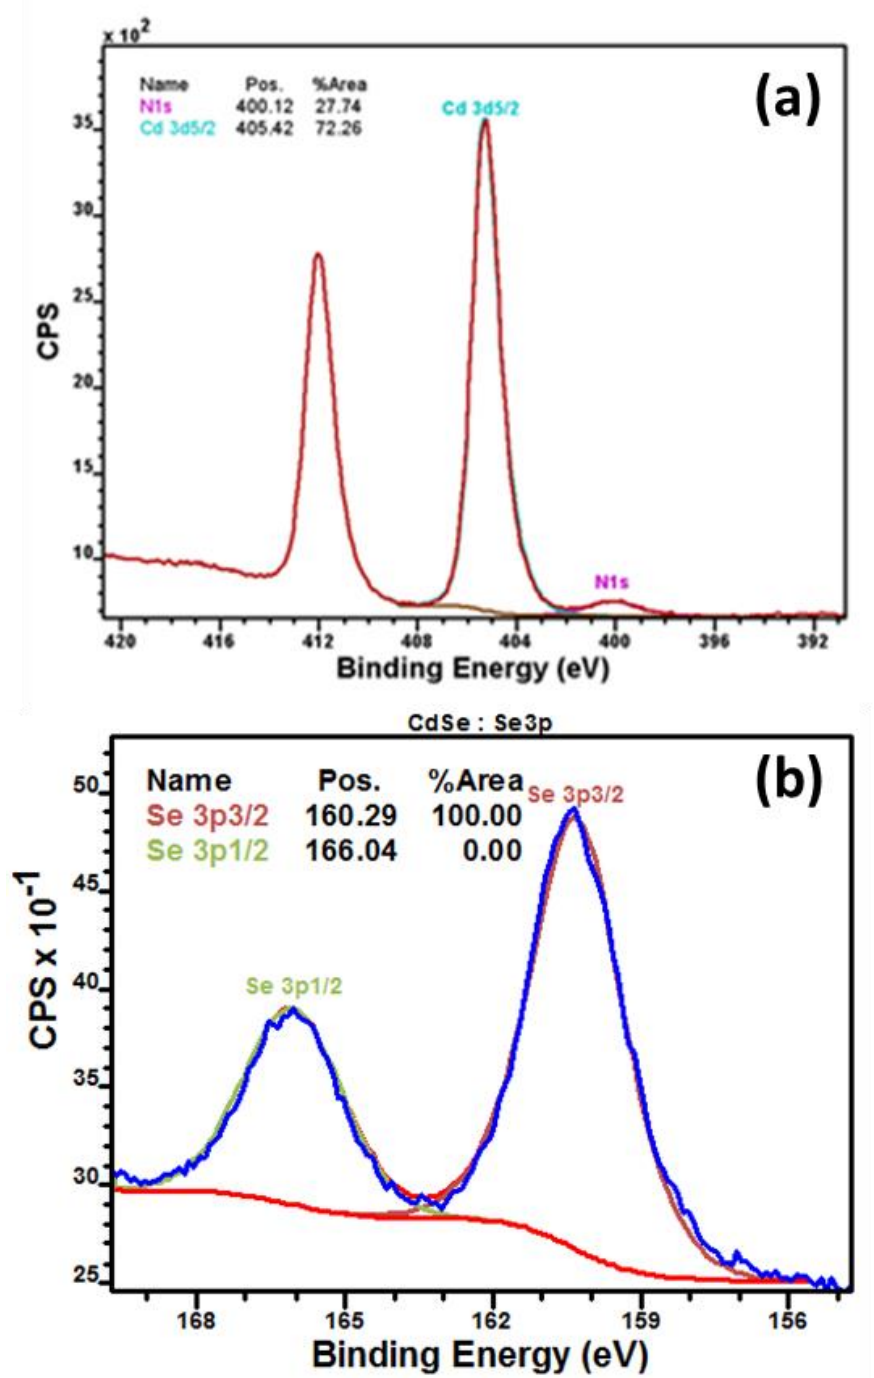

**Figure S3:** High resolution XPS spectra of (a) Cd 3d<sub>5/2</sub>, (b) Se 3p recorded for CdSe NRs.

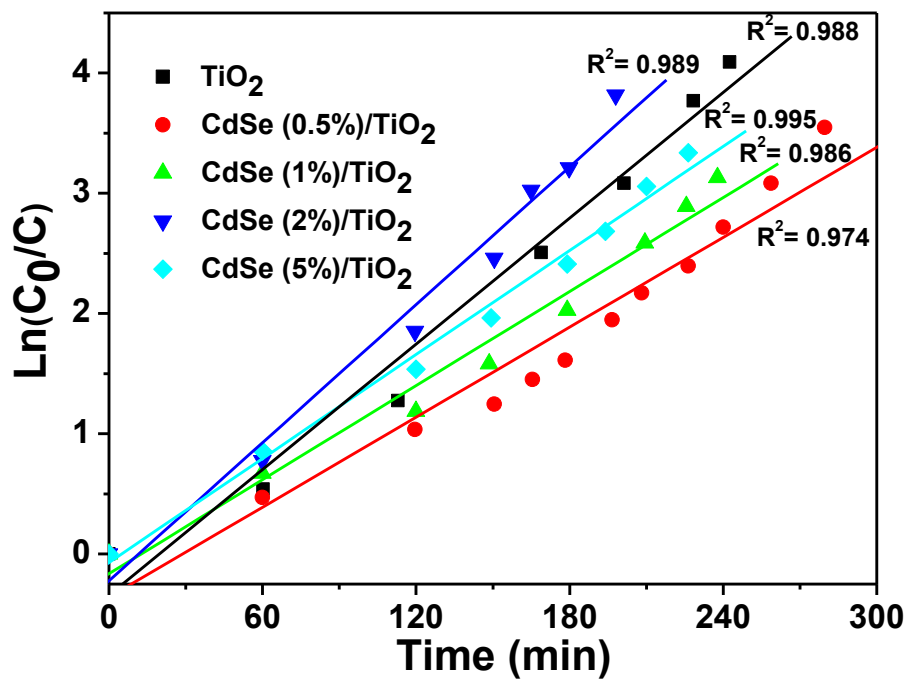

**Figure S4:** Pseudo first-order kinetics of RhB degradation using TiO<sub>2</sub> and CdSe/TiO<sub>2</sub> composites.

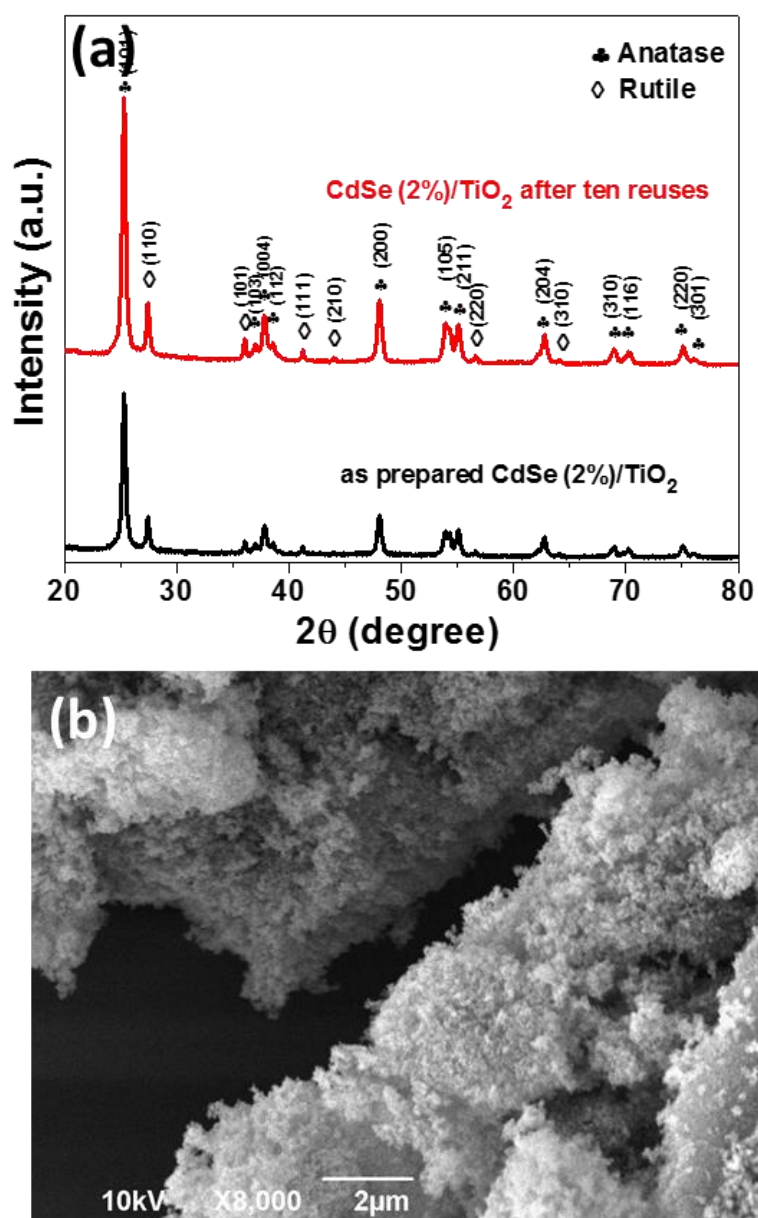

**Figure S5:** (a) XRD patterns of the CdSe (2%)/TiO<sub>2</sub> photocatalyst after synthesis and after ten reuses. (b) SEM image of the CdSe (2%)/TiO<sub>2</sub> photocatalyst after ten reuses.
